# Supplementary material for: Effect of citrus peel extracts on the cellular quiescence of prostate cancer cells
Source: Royal Society of Chemistry journal article supplement (doi:10.1039/c9fo00455f), 2019-01-01
Supplement: c9fo00455f1.pdf [file c9fo00455f1.pdf]

1 **Supplementary Information**

2

3

a) PC-3, CPE/hexane

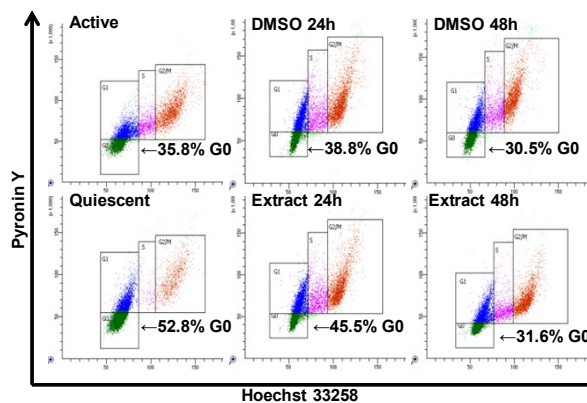

b) PC-3, CPE/water

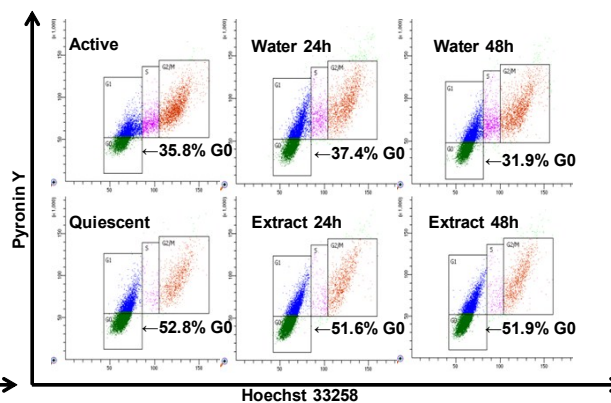

c) LNCaP, CPE/hexane

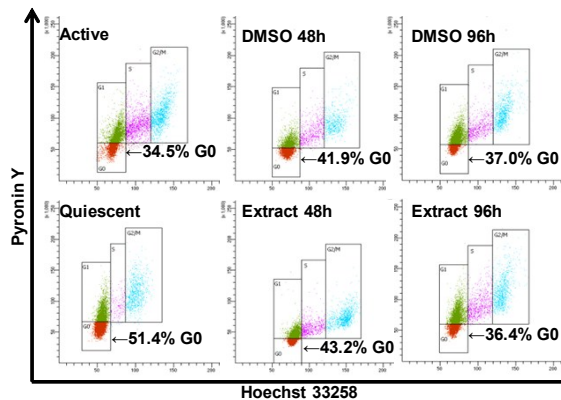

d) LNCaP, CPE/water

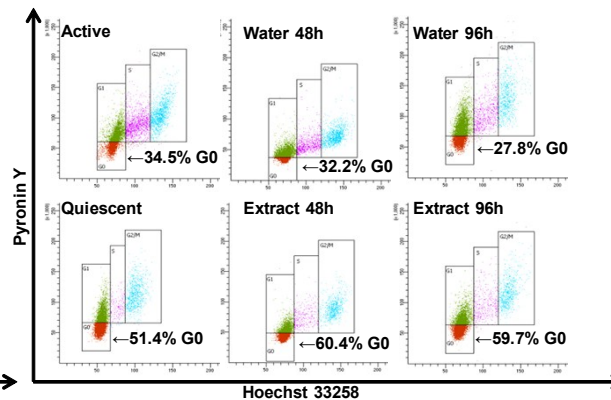

4

5

6 **Figure S1:** Representative flow cytometer images showing proportion of G0 cells in proliferating, quiescent, and  
7 during cell cycle re-entry with CPE at IC<sub>50</sub> or control at indicated hour for PC-3 cells treated with CPE/water (a) and  
8 CPE/hexane (b) extract, while for LNCaP cells treated with CPE/water (c) and CPE/hexane (d). Proliferating  
9 (control cells: non-quiescent cells). Quiescent (quiescent cells: LNCaP after serum withdrawal for 7 days or PC-3  
10 after contact inhibition for 3 days).

11

12

13

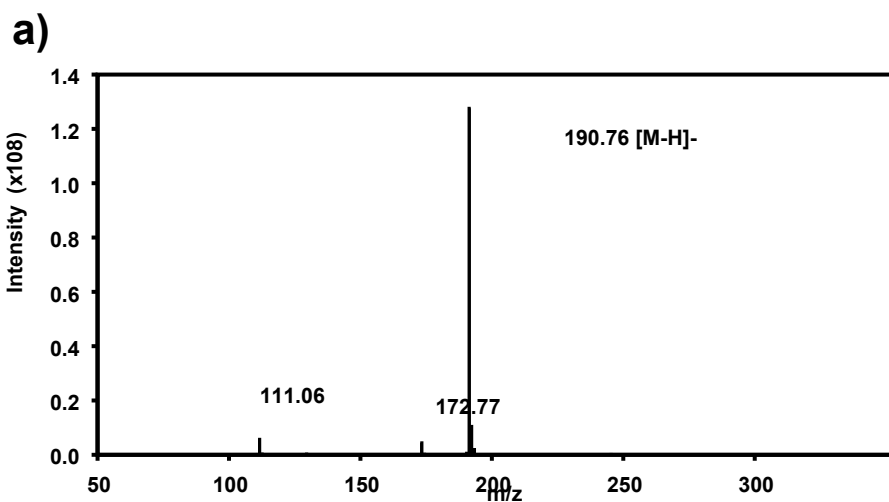

14

15

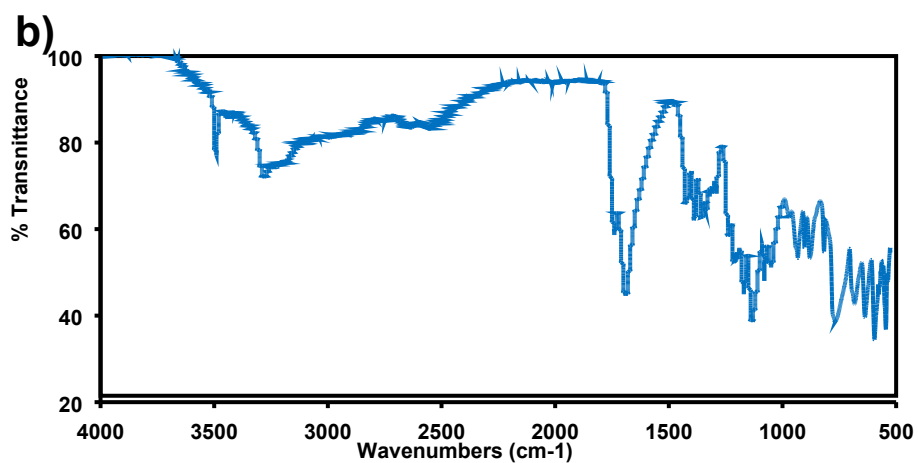

16

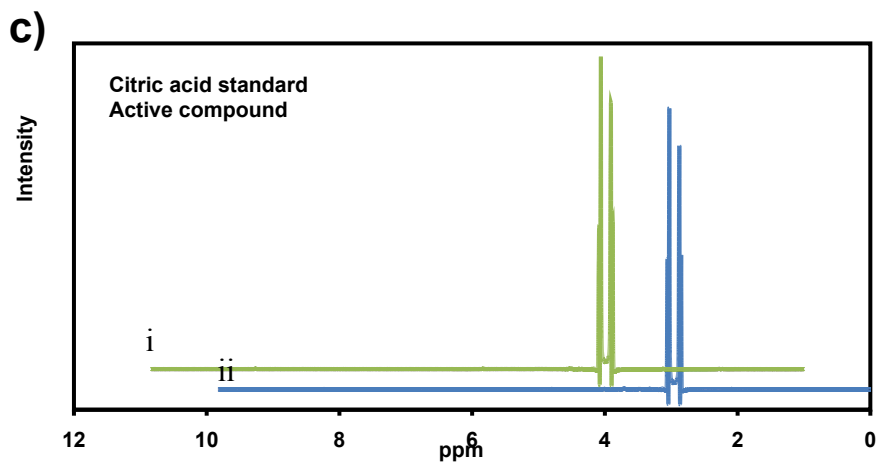

17

18 **Figure S2:** APCI-MS spectra (a), FTIR spectrum (b) of the active compound and  $^1\text{H-NMR}$  spectrum in  $\text{D}_2\text{O}$  of the  
19 citric acid standard and active compound.

20

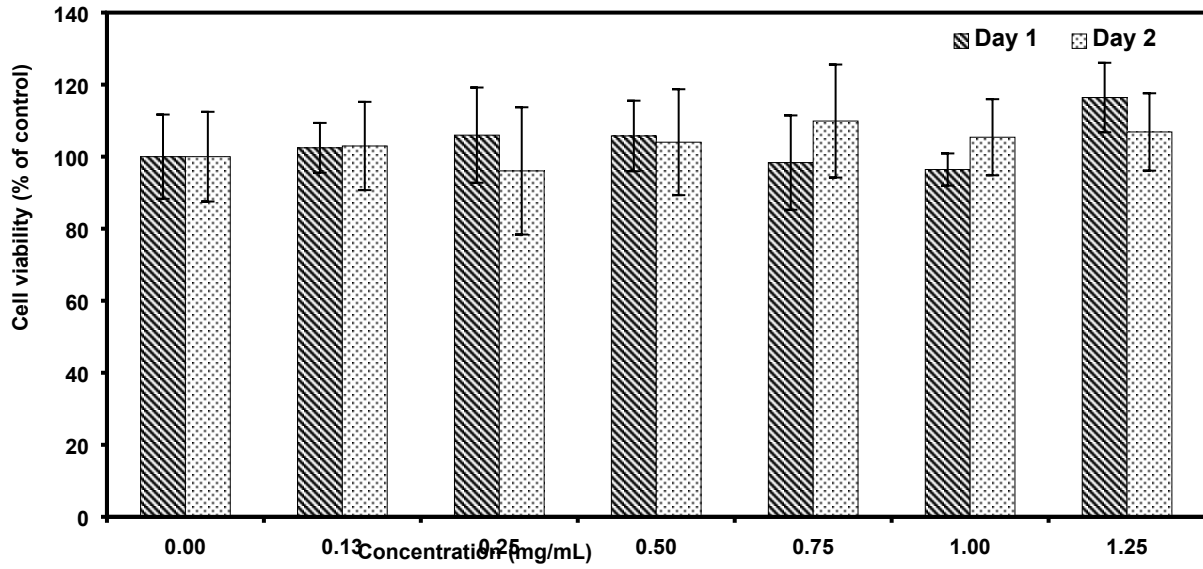

21

22 **Figure S3:** Cell viability effect of the citric acid standard on the human fibroblast normal GM3348 cells.

23 Data are expressed as the mean±S.D of three independent experiments.

24
